# Supplementary material
Source: publisher site journal article supplement (https://www.spandidos-publications.com/1739/downloadSupplementary)

Figure S1. mRNA expression levels after transfection with expression plasmid pRK5-Akt or pRK5-NF- $\kappa$ B in EPCs after 72 h of transfection. (A) Akt mRNA expression levels in EPCs after transfection with expression plasmid pRK5-Akt. (B) NF- $\kappa$ B mRNA expression levels in EPCs after transfection with expression plasmid pRK5-Akt. \*\* $P < 0.01$ . EPC, endothelial progenitor cell; NF, nuclear filament; p, phosphorylated.

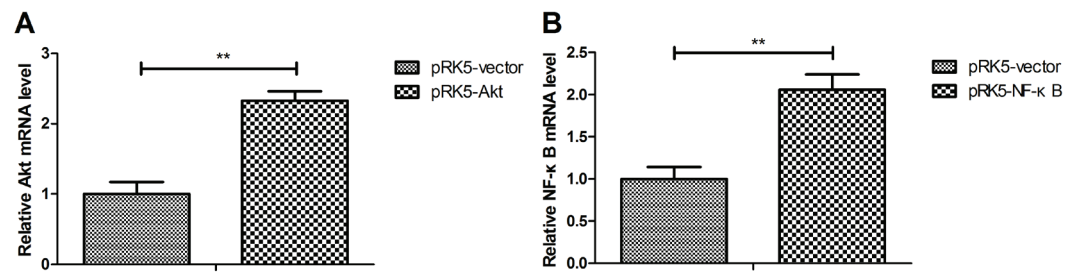

Supplement: Supplementary file 1 [file downloadSupplementary]
